# Supplementary material for: SVALKA-POLYCOMB REPRESSIVE COMPLEX2 module controls C-REPEAT BINDING FACTOR3 induction during cold acclimation
Source: PubMed Central journal article supplement — Plant Physiol. 2023 Dec 20;195(2):1152–60. doi: 10.1093/plphys/kiad671 (PMC11142377; doi:10.1093/plphys/kiad671), 2023-12-20
Supplement: kiad671_supplementary_data.pdf [file kiad671_supplementary_data.pdf]

## Supplemental Figure S1

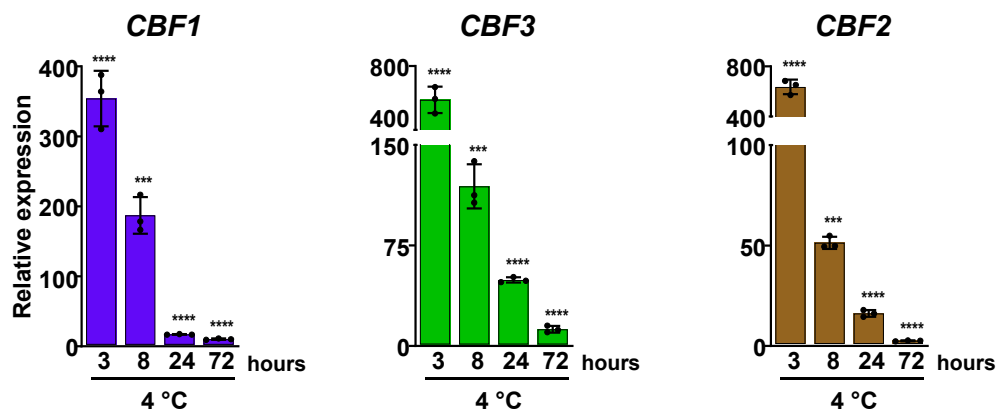

### Supplemental Figure S1. The induction of *CBFs* strongly declines after 24 hours of cold exposure

Expression analysis of *CBF1*, *CBF3* and *CBF2* in 2-week-old WT plants exposed additionally to 4 °C for the indicated hours. In all cases, transcript levels, determined by RT-qPCR, are represented as relative to the values of the WT plants grown under control conditions. Primer sets 2, 5 and 7 in Figure 1A were used for expression analysis of *CBF1*, *CBF3* and *CBF2*, respectively. Asterisks indicate significant differences (\*\*\*P<0.001, \*\*\*\*P<0.0001) between the transcript levels of each gene at the indicated time and the levels in WT plants grown under control conditions, as determined by one-sided *t* test. All data represent the mean of three independent experiments, and error bars show the standard deviation.

Supplemental Figure S2

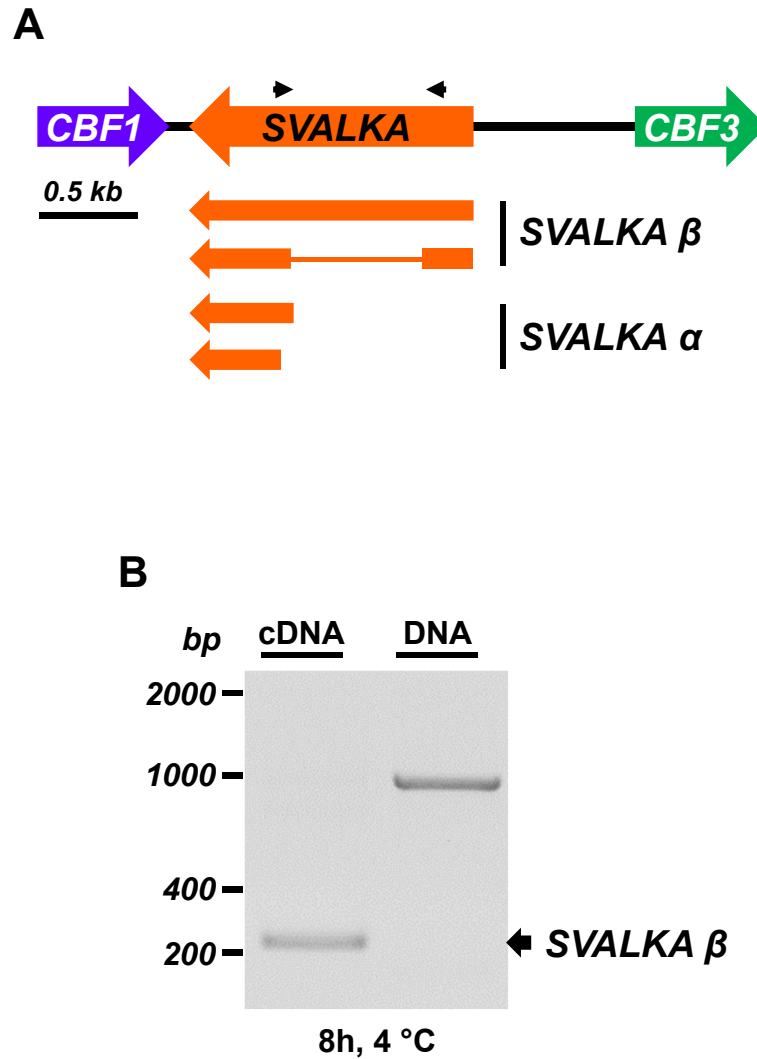

**Supplemental Figure S2. The  $\beta$  isoform is the *SVALKA* transcript analyzed in this study.**

**A**, Schematic representation of *SVALKA* genomic region. Arrowheads indicate the position of the primers used in this work for *SVALKA* detection. The different long ( $\beta$ ) and short ( $\alpha$ ) *SVALKA* transcripts generated in response to low temperature, including a long a spliced  $\beta$  isoform, are shown below. **B**, *SVALKA* transcripts, detected by RT-PCR with the primers indicated in (**A**), in 2-week-old WT plants exposed 8 hours to 4 °C. Genomic DNA from the same plants was amplified by PCR with the same primers as a size reference.

## Supplemental tables

**Supplemental Table S1. Specific primers used in this study**

| <b>Related figure</b>      | <b>Name</b>           | <b>Sequence (5'- 3')</b>   |
|----------------------------|-----------------------|----------------------------|
| <b>Related to Figure 1</b> | 1-F ( <i>CBF1</i> )   | ATCTCTCCTCCGGCCAATAT       |
|                            | 1-R ( <i>CBF1</i> )   | TCAGGTAGATTCTTTTTCAAGTGTGT |
|                            | 2-F ( <i>CBF1</i> )   | GTCAACATGCGCCAAGGATA       |
|                            | 2-R ( <i>CBF1</i> )   | TCGGCATCCCAAACATTGTC       |
|                            | 3-F ( <i>CBF1</i> )   | TTCGATAGTCGTTTCCATTTTTGT   |
|                            | 3-R ( <i>CBF1</i> )   | TTTTCCACTCGTTTCTACAACAAT   |
|                            | 4-F ( <i>CBF3</i> )   | GACACAAACTCCGTCTTCGC       |
|                            | 4-R ( <i>CBF3</i> )   | AGTTGGAGTGAGAGCATGCT       |
|                            | 5-F ( <i>CBF3</i> )   | CAACTTGCGCTAAGGACA         |
|                            | 5-R ( <i>CBF3</i> )   | TCTCAAACATCGCCTCAT         |
|                            | 6-F ( <i>CBF3</i> )   | TCAGTTTCAGTATAAGTGTGGGCT   |
|                            | 6-R ( <i>CBF3</i> )   | CTGAATCGGTTGTTTCGGTTT      |
|                            | 7-F ( <i>CBF2</i> )   | GAATCCCGGAATCAACCTGT       |
|                            | 7-R ( <i>CBF2</i> )   | CCCAACATCGCCTCTTCATC       |
|                            | AT4G26410-F           | GAGCTGAAGTGGCTTCCATGAC     |
| AT4G26410-R                | GGTCCGACATACCCATGATCC |                            |
| <b>Related to Figure 2</b> | KIN1-F                | ATTCGGGTCAAATTTGGGAG       |
|                            | KIN1-R                | TGAATATAAGTTTGGCTCGTC      |
|                            | XERO2-F               | TTCCCGGTGGTCATCACTAG       |
|                            | XERO2-R               | GCGACTCAATGAAAGAAAGCCAC    |
|                            | GOLS3-F               | AGGGAAGACATCAAGATGCTT      |
|                            | GOLS3-R               | GCACATCAGCTTCAGACAAAT      |
|                            | COR15B-F              | CCAATGAAACTGCGACTGAG       |
|                            | COR15B-R              | ATGAGTGGTTGAATCAGGAC       |
| <b>Related to Figure 3</b> | SVK-F                 | CTACCTCTTCCCCACCTT         |
|                            | SVK-R                 | TCTTCTCGTTGTCGTCTTG        |

**Supplemental Table S2. Buffers used in this study**

| <b>Protocol</b>                        | <b>Name</b>        | <b>Composition</b>                                                                                                                                                                                                                                                  |
|----------------------------------------|--------------------|---------------------------------------------------------------------------------------------------------------------------------------------------------------------------------------------------------------------------------------------------------------------|
| <b>Nuclear RNA immunoprecipitation</b> | Honda buffer       | 20 mM Hepes KOH pH 7.4, 0.44 M sucrose, 1.25% Ficoll, 2.5% Dextran T-40, 10 mM MgCl <sub>2</sub> , 0.5% Triton X-100, 5 mM DTT, 1 mM PMSF, 1x cOmplete™ Protease Inhibitor Cocktail Mini, EDTA-free (Roche) and 8 U/ml Ribolock RNase Inhibitor (Thermo-Scientific) |
|                                        | Nuclei Wash buffer | 20 mM Hepes KOH pH 7.4, 0.44 M sucrose, 10 mM MgCl <sub>2</sub> , 5 mM DTT, 1x cOmplete™ Protease Inhibitor Cocktail Mini, EDTA-free (Roche), 1mM PMSF and 8 U/ml Ribolock RNase Inhibitor                                                                          |
|                                        | Lysis buffer       | 50 mM Tris-HCl pH 8.0, 10 mM EDTA, 1 % SDS, 1x cOmplete™ Protease Inhibitor Cocktail Mini, EDTA-free (Roche), 1mM PMSF, 160 U/ml Ribolock RNase Inhibitor and 25 µM MG132 Proteasome Inhibitor                                                                      |
|                                        | Dilution buffer    | 16.7 mM Tris-HCl pH 8.0, 1.1% Triton X-100, 1.2 mM EDTA, 167 mM NaCl, 1x cOmplete™ Protease Inhibitor Cocktail Mini, EDTA-free (Roche), 1mM PMSF, 160 U/ml Ribolock RNase Inhibitor and 25 µM MG132 Proteasome Inhibitor                                            |
|                                        | Beads Wash buffer  | 20 mM Tris-HCl pH 8.0, 150 mM NaCl, 2 mM EDTA, 1% Triton X-100, 0.1% SDS, 1x cOmplete™ Protease Inhibitor Cocktail Mini, EDTA-free (Roche), 1mM PMSF, 40 U/ml Ribolock RNase Inhibitor and 5 U/ml DNase I                                                           |
|                                        | Elution buffer     | 50 mM Tris-HCl pH 8.0, 0.5% SDS and 40 U/ml RNase Inhibitor                                                                                                                                                                                                         |
| <b>Chromatin Immunoprecipitation</b>   | Extraction buffer  | 10 mM Tris-HCl pH 8.0, 0.25 M sucrose, 10 mM MgCl <sub>2</sub> , 1% Triton X-100, 1x cOmplete™ Protease Inhibitor Cocktail Mini, EDTA-free (Roche) and 1mM PMSF                                                                                                     |
|                                        | Lysis buffer       | 50 mM Tris-HCl, pH 8.0, 10 mM EDTA, 1x cOmplete™ Protease Inhibitor Cocktail Mini, EDTA-free (Roche), 1mM PMSF and 1% SDS                                                                                                                                           |
|                                        | Dilution buffer    | 16.7 mM Tris-HCl pH 8.0, 1.1% Triton X-100, 1.2 mM EDTA, 167 mM NaCl, 1x cOmplete™ Protease Inhibitor Cocktail Mini, EDTA-free (Roche) and 1mM PMSF                                                                                                                 |

**Supplemental Table S3. Full names of the genes mentioned in this study**

| <b>AGI</b>       | <b>Gene Symbol</b> | <b>Brief description</b>                                                                                                                                                                                                                                      |
|------------------|--------------------|---------------------------------------------------------------------------------------------------------------------------------------------------------------------------------------------------------------------------------------------------------------|
| <i>AT4G25490</i> | <i>CBF1</i>        | Encodes a transcriptional activator that binds to the <i>DRE/CRT</i> regulatory element and induces cold-regulated ( <i>COR</i> ) gene expression increasing plant freezing tolerance.                                                                        |
| <i>AT4G25470</i> | <i>CBF2</i>        | Encodes a transcriptional activator that binds to the <i>DRE/CRT</i> regulatory element and induces cold-regulated ( <i>COR</i> ) gene expression increasing plant freezing tolerance.                                                                        |
| <i>AT4G25480</i> | <i>CBF3</i>        | Encodes a transcriptional activator that binds to the <i>DRE/CRT</i> regulatory element and induces cold-regulated ( <i>COR</i> ) gene expression increasing plant freezing tolerance.                                                                        |
| <i>AT4G07395</i> | <i>SVALKA</i>      | Encodes a long non-coding RNA involved in cold acclimation by limiting <i>CBF1</i> induction via RNAPII collision stemming from the <i>SVALKA-asCBF1</i> lncRNA cascade.                                                                                      |
| <i>AT2G23380</i> | <i>CLF</i>         | Encodes a catalytic component of the PRC2 complex.                                                                                                                                                                                                            |
| <i>AT4G02020</i> | <i>SWN</i>         | Encodes a component of a large protein complex that can include VERNALIZATION 2 ( <i>VRN2</i> ), VERNALIZATION INSENSITIVE 3 ( <i>VIN3</i> ) and polycomb group of proteins FERTILIZATION INDEPENDENT ENDOSPERM ( <i>FIE</i> ) and CURLY LEAF ( <i>CLF</i> ). |
|                  | <i>COLDAIR</i>     | Encodes a long noncoding RNA that is necessary for the repression of the floral repressor FLOWERING LOCUS C ( <i>FLC</i> ) during vernalization.                                                                                                              |
|                  | <i>COLDWRAP</i>    | Encodes an antisense long noncoding RNA                                                                                                                                                                                                                       |
|                  | <i>AG-incRNA4</i>  | Encodes a long noncoding RNA that acts as a co-repressor with CURLY LEAF ( <i>CLF</i> ) to confer <i>AG</i> tissue-specific expression                                                                                                                        |
| <i>AT5G15960</i> | <i>KIN1</i>        | Cold- and ABA- inducible gene. Possibly functions as an anti-freeze protein.                                                                                                                                                                                  |
| <i>AT3G50970</i> | <i>XERO2</i>       | Encodes a dehydrin protein.                                                                                                                                                                                                                                   |
| <i>AT1G09350</i> | <i>GOLS3</i>       | Predicted to encode a galactinol synthase                                                                                                                                                                                                                     |
| <i>AT2G42530</i> | <i>COR15B</i>      | Encodes <i>COR15B</i> , a protein that protects chloroplast membranes during freezing.                                                                                                                                                                        |
| <i>AT4G26410</i> | <i>RHIP1</i>       | Encodes a protein predicted to have a 3-stranded helical structure that interacts with both <i>AtRGS1</i> and <i>AtHXX1</i> in planta and is required for glucose-regulated gene expression.                                                                  |
